# Supplementary material for: Novel Scorpion Toxin ω-Buthitoxin-Hf1a Selectively Inhibits Calcium Influx via CaV3.3 and CaV3.2 and Alleviates Allodynia in a Mouse Model of Acute Postsurgical Pain
Source: MDPI journal article supplement (doi:10.3390/ijms25094745), 2024-04-26
Supplement: s1 [file s1]

# SUPPORTING INFORMATION

## Novel Scorpion Toxin $\omega$ -Buthitoxin-Hf1a Selectively Inhibits Calcium Influx via Cav3.3 and Cav3.2 and Alleviates Allodynia in a Mouse Model of Acute Postsurgical Pain

Dan Wang <sup>1,2,\*</sup>, Volker Herzig <sup>3,4</sup>, Zoltan Dekan <sup>2</sup>, K. Johan Rosengren <sup>5</sup>, Colton D. Payne <sup>5</sup>, Md. Mahadhi Hasan <sup>6</sup>, Jiajie Zhuang <sup>1</sup>, Emmanuel Bourinet <sup>7</sup>, Lotten Ragnarsson <sup>2</sup>, Paul F. Alewood <sup>2</sup> and Richard J. Lewis <sup>2,\*</sup>

<sup>1</sup> Department of Chinese Medicine and Pharmacy, School of Pharmacy, Jiangsu University, Zhenjiang 212013, China; 3201603097@stmail.ujs.edu.cn

<sup>2</sup> Division of Chemistry and Structural Biology, Institute for Molecular Bioscience, The University of Queensland, Brisbane, QLD 4072, Australia; ivydan92@gmail.com (Z.D.); l.ragnarsson@imb.uq.edu.au (L.R.); p.alewood@imb.uq.edu.au (P.F.A.)

<sup>3</sup> Centre for Bioinnovation, University of the Sunshine Coast, Sippy Downs, QLD 4556, Australia; vherzig@usc.edu.au

<sup>4</sup> School of Science, Technology and Engineering, University of the Sunshine Coast, Sippy Downs, QLD 4556, Australia

<sup>5</sup> School of Biomedical Sciences, The University of Queensland, Brisbane, QLD 4072, Australia; j.rosengren@uq.edu.au (K.J.R.); c.payne@uq.net.au (C.D.P.)

<sup>6</sup> Pharmacy Discipline, Life Science School, Khulna University, Khulna 9208, Bangladesh; mahadhi@pharm.ku.ac.bd

<sup>7</sup> Institute of Functional Genomics, Montpellier University, CNRS, INSERM, 34090 Montpellier, France; emmanuel.bourinet@igf.cnrs.fr

\* Correspondence: danwang@ujs.edu.cn (D.W.); r.lewis@imb.uq.edu.au (R.J.L.); Tel.: +61-7-3346-2984 (R.J.L.)

### 1. Supplementary Results

#### 1.1. High-throughput FLIPR venom screening at Cav3.2

55 crude venoms from 52 scorpion species of 20 genera across 6 families of scorpions were selected from the collected venom library, and screened at Cav3.2 FLIPR window current assays with 10  $\mu$ g/well (Figure S1). Inhibitory crude venoms with >50% inhibition are presented in Table S1.

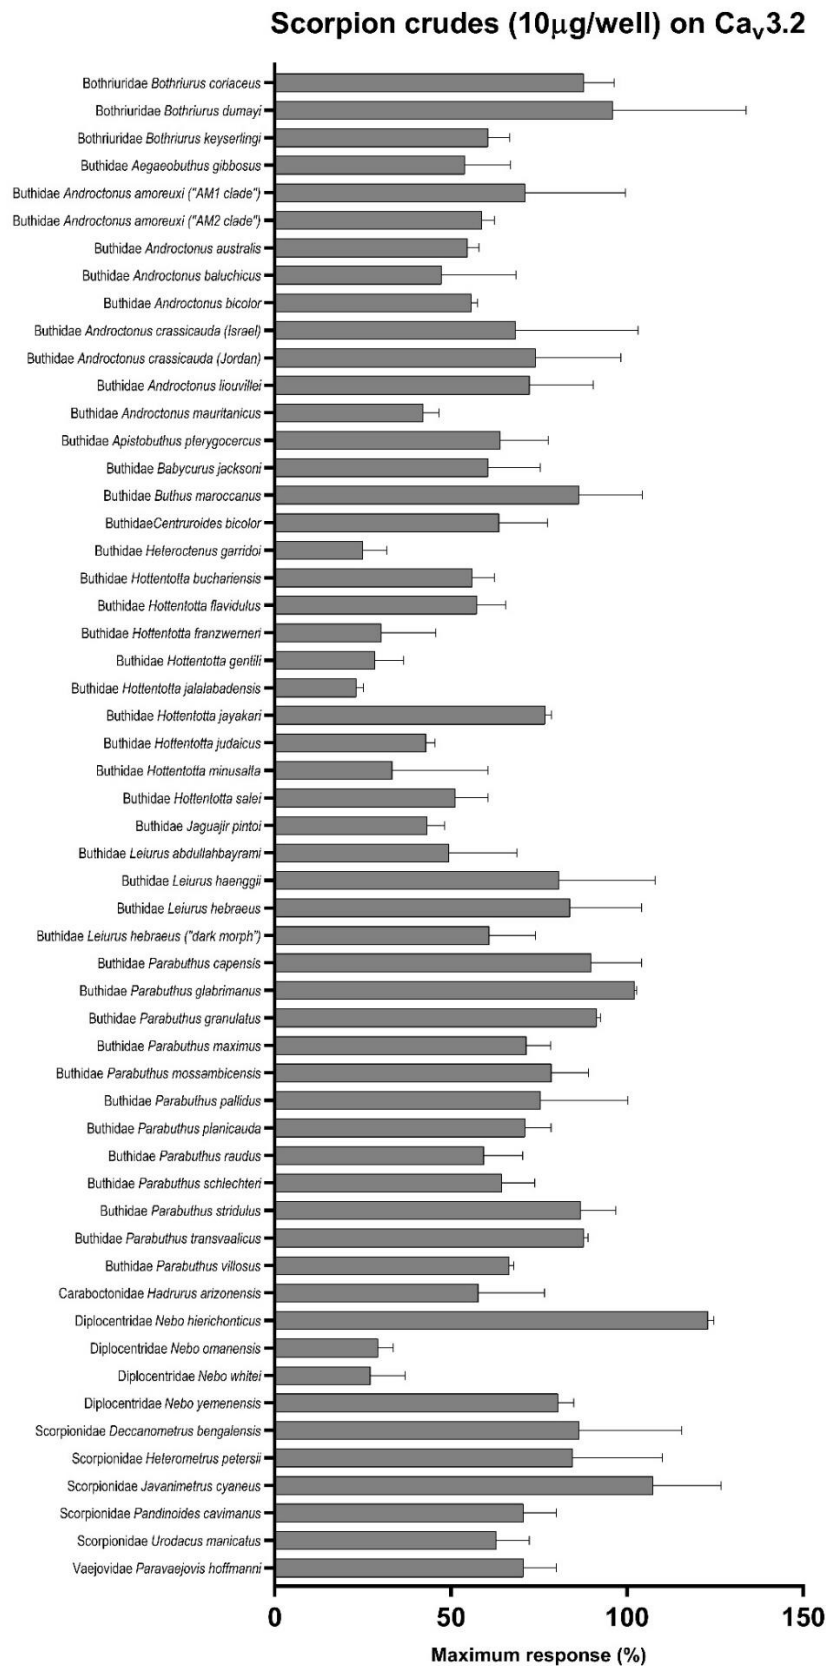

**Figure S1.** Activity of 55 scorpion crude venoms at Cav3.2 expressed in HEK293 cells. Data are means  $\pm$  SEM of single experiments per venom performed in duplicate.

**Table S1.** Crude venoms with >50% inhibition of Cav3.2 FLIPR responses

| Inhibition | Genus               | Species               | Sex | Family         | Organism |
|------------|---------------------|-----------------------|-----|----------------|----------|
| >70%       | <i>Hottentotta</i>  | <i>franzweneri</i>    | m   | Buthidae       | scorpion |
| >70%       | <i>Hottentotta</i>  | <i>gentili</i>        | m   | Buthidae       | scorpion |
| >70%       | <i>Hottentotta</i>  | <i>jalalabadensis</i> | f   | Buthidae       | scorpion |
| >70%       | <i>Heteroctenus</i> | <i>garroidi</i>       | m   | Buthidae       | scorpion |
| >70%       | <i>Nebo</i>         | <i>omanensis</i>      | f   | Diplocentridae | scorpion |
| >70%       | <i>Nebo</i>         | <i>whitei</i>         | f   | Diplocentridae | scorpion |
| >60%       | <i>Hottentotta</i>  | <i>minusalta</i>      | f   | Buthidae       | scorpion |
| >50%       | <i>Androctonus</i>  | <i>baluchicus</i>     | m   | Buthidae       | scorpion |
| >50%       | <i>Androctonus</i>  | <i>mauritanicus</i>   | n/a | Buthidae       | scorpion |
| >50%       | <i>Jaguajir</i>     | <i>pinto</i>          | n/a | Buthidae       | scorpion |

### 1.2. Determination of peptide mass and NMR structure

Figure S2 shows the main results in MALDI TOF MS of scorpion *Hottentotta franzweneri* fractions I (1195.4 Da) and II (1196.4 Da) in positive ion mode. After the purity (>98%) of synthetic Hf1a-NH<sub>2</sub> being confirmed by HPLC and correct mass confirmed by electrospray ionization mass spectrometry (ESI MS) (Figure S3), its NMR statistics data was acquired and summarized in Table S2.

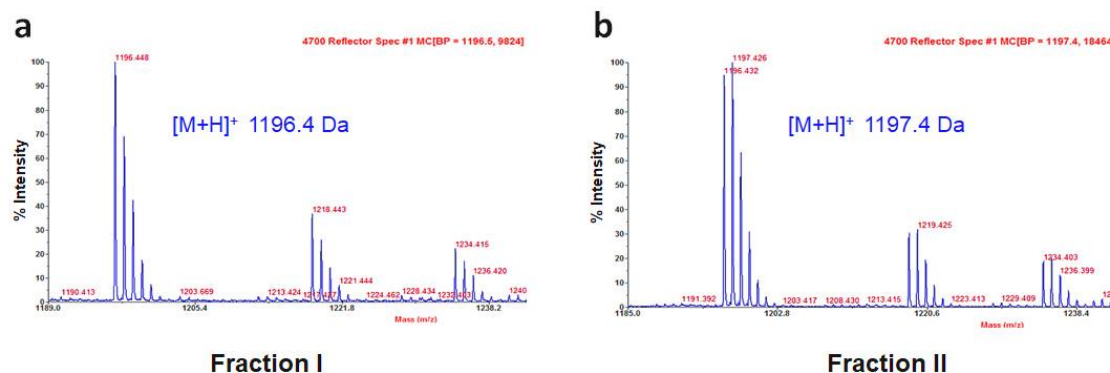

**Figure S2.** (a) MALDI TOF MS result of scorpion *H. franzweneri* fraction I with a main average mass of 1195.4 Da. (b) MALDI TOF MS result of scorpion *H. franzweneri* fraction II with a main average mass of 1196.4 Da.

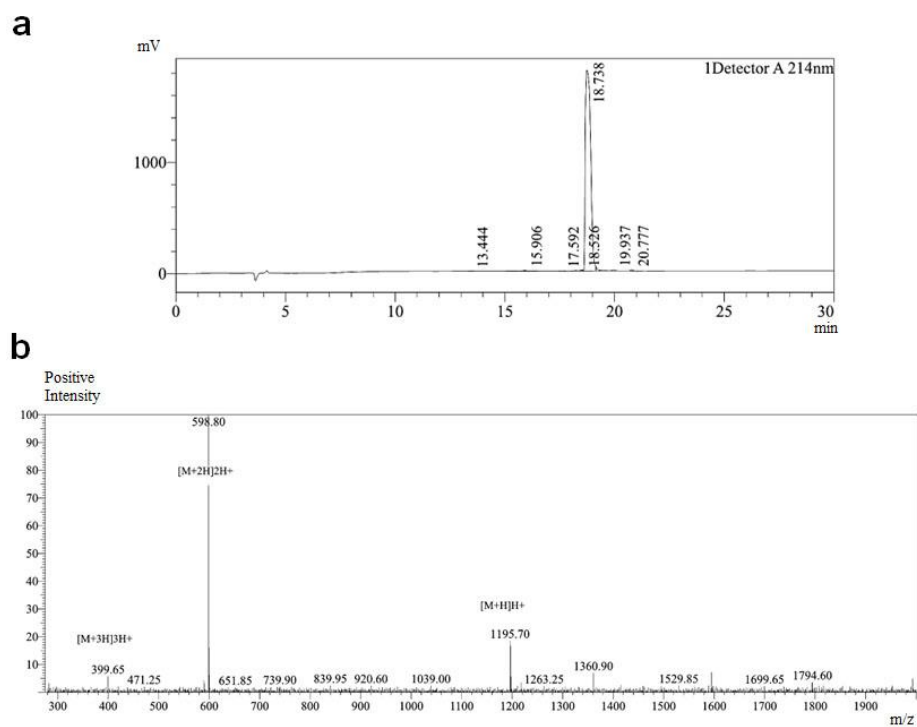

**Figure S3.** (a) RP-HPLC trace of synthetic Hf1a-NH<sub>2</sub> using the gradient of 5–35% solvent B over 30 min, where Solvent A consists of 0.1% trifluoroacetic acid (TFA) in milli-Q water, while solvent B consists of 0.1% TFA in acetonitrile. (b) ESI MS result of synthetic Hf1a-NH<sub>2</sub> with observed mass of 1195.6 Da.

**Table S2.** NMR statistics data for Hf1a-NH<sub>2</sub>

| Energies (kcal/mol)           | Hf1a-NH <sub>2</sub> |
|-------------------------------|----------------------|
| Overall                       | -275.67 ± 12.79      |
| Bonds                         | 3.84 ± 0.45          |
| Angles                        | 9.31 ± 1.42          |
| Improper                      | 3.15 ± 1.18          |
| Dihedral                      | 43.31 ± 1.01         |
| Van der Waals                 | -27.21 ± 4.17        |
| Electrostatic                 | -308.23 ± 11.80      |
| NOE                           | 0.033 ± 0.010        |
| Cdih                          | 0.118 ± 0.134        |
| <b>MolProbity Statistics</b>  |                      |
| Clashes (>0.4 Å / 1000 atoms) | 2.13 ± 3.13          |
| Poor rotamers                 | 0.05 ± 0.22          |
| Ramachandran Outliers (%)     | 0                    |
| Ramachandran Favoured (%)     | 100                  |

|                                                |                 |
|------------------------------------------------|-----------------|
| MolProbity score                               | $0.87 \pm 0.42$ |
| Molprobity score percentile                    | $99.3 \pm 0.92$ |
| Residues with bad bonds                        | $0.15 \pm 0.37$ |
| Residues with bad angles                       | 0               |
| <b>Atomic RMSD (Å)</b>                         |                 |
| Mean global backbone (residues 2-9)            | $0.43 \pm 0.13$ |
| Mean global heavy (residues 2-9)               | $1.06 \pm 0.21$ |
| <b>Experimental Restraints</b>                 |                 |
| <b>Distance restraints</b>                     |                 |
| Short range ( $i-j < 2$ )                      | 55              |
| Medium range ( $i-j < 5$ )                     | 10              |
| Long range ( $i-j > 5$ )                       | 3               |
| Hydrogen bonds                                 | 2               |
| Total                                          | 70              |
| <b>Dihedral angle restraints</b>               |                 |
| $\phi$                                         | 7               |
| $\psi$                                         | 4               |
| Total                                          | 11              |
| <b>Violations from experimental restraints</b> |                 |
| Total NOE violations exceeding 0.2 Å           | 0               |
| Total Dihedral violations exceeding 2.0°       | 0               |

### 1.3. Evaluation of the effects of $\omega$ -Buthitoxin-Hf1a on $I$ - $V$ curves of Cav3.2 and Cav3.3

Current-voltage ( $I$ - $V$ ) relationships of Cav3.2 and Cav3.3 in the presence of 1  $\mu$ M Hf1a-NH<sub>2</sub> revealed that block was not accompanied by shifts in the  $I$ - $V$  relationship (Figure S4).

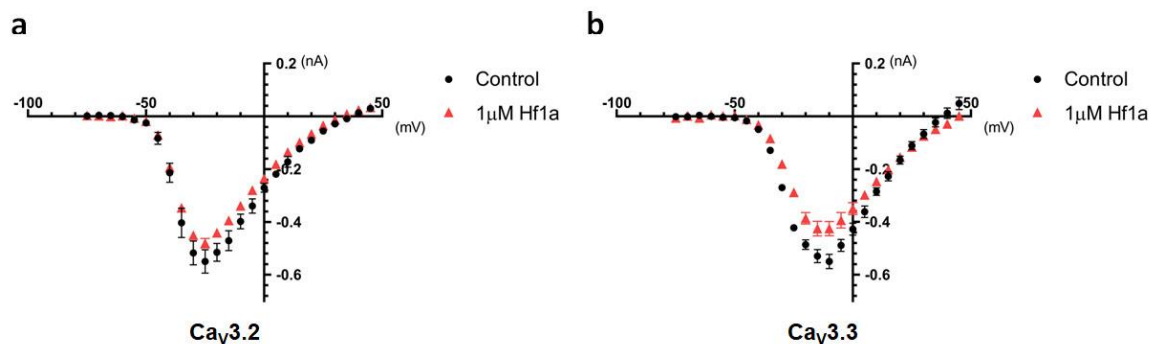

**Figure S4.** Comparison of the  $I$ - $V$  relationships of Cav3.2 and Cav3.3 before (black) and after (red) the addition of 1  $\mu$ M Hf1a-NH<sub>2</sub>. The cells were holding at  $-100$  mV before applying 50 ms pulses to potentials from  $-75$  to  $+45$  mV every 5 s in 5 mV increments. (a)  $I$ - $V$  relationships of Cav3.2 ( $n = 3$ ) plotted from  $-75$  mV to  $+45$  mV,  $V_{\max}$  at  $-25$  mV. (b)  $I$ - $V$  relationships of Cav3.3 ( $n = 3$ ) plotted from  $-75$  mV to  $+45$  mV,  $V_{\max}$  at  $-10$  mV. Error bars represent the SEM.

#### 1.4. Locomotor Performance Assessment

Locomotor effects of 24h post administration of Hf1a-NH<sub>2</sub> and MVIIA were measured using a Process Control Treadmill apparatus by assessing distance covered and motor function of the mice. The distance covered for Hf1a-NH<sub>2</sub> and MVIIA treated mice showed no difference from vehicle treated mice, and no abnormal motor functions like foot slips were noticed during the run (Figure S5).

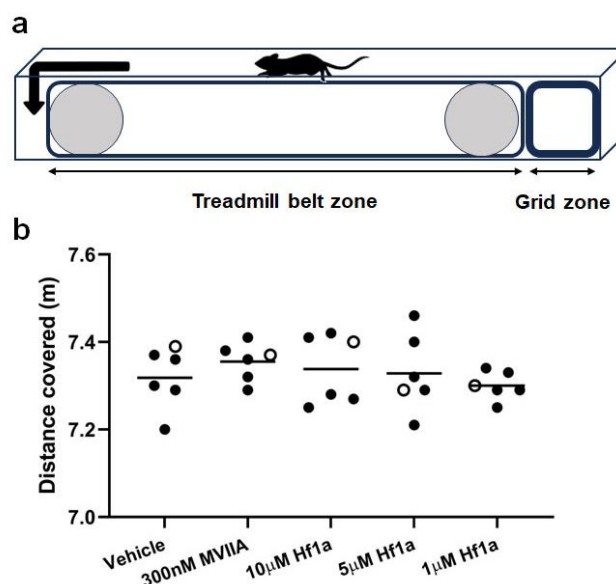

**Figure S5.** Locomotor behavior of mice assessed 48 h post-surgery. (a) Side view of the treadmill instrument; (b) There are no differences in the mean distance covered among Hf1a (1µM, 5µM and 10 µM Hf1a; 20 µL) injected mice, control peptide MVIIA (300 nM; 20 µL) injected mice and vehicle mice.

#### 1.5. Evaluation of insecticidal activities of $\omega$ -Buthitoxin-Hf1a against sheep blowflies

Hf1a-NH<sub>2</sub> and Hf1a-OH toxicity was tested against sheep blowflies (*Lucilia cuprina*), at doses 1, 4 and 10 µg per fly, and no insecticidal activity was observed.

## 2. Supplementary Method

#### 1.1. Evaluation of insecticidal activities against sheep blowflies

Peptide insecticidal toxicity was tested using 1, 4 and 10 µg peptide for three groups of Australian sheep blowflies (*Lucilia cuprina*), respectively, each group with 10 flies. Peptide was prepared in milliQ water, and a maximum volume of 2 µL was injected per fly using a 1.0 mL Terumo Insulin syringe (B-D Ultra-Fine, Terumo Medical Corporation, MD, USA) with a fixed 29-gauge needle fitted to an Arnold hand micro-applicator (Burkard Manufacturing Co. Ltd., Rickmansworth, UK). Flies were individually housed in 2 mL Eppendorf tubes and paralytic effects determined 0.5, 1, 2 and 24 h after injection. 20 flies injected with only milliQ water were set as control.
